# Supplementary material for: Molecular and genetic inflammation networks in major human diseases
Source: Royal Society of Chemistry journal article supplement (doi:10.1039/c6mb00240d), 2016-06-15
Supplement: c6mb00240d1.xlsx [file c6mb00240d1.xlsx]

## Sheet: Inflammtion_Gene_Table
Table S1. Information about the genes mentioned in the paper including gene symbol, function, ENSEMBLE/MGD/OMIM ID and drugs targeting these genes.
symbol	name	ensembl_gene_id	mgd_id	cosmic	omim_id	drug
ABCA1	ATP binding cassette subfamily A member 1	ENSG00000165029	MGI:99607	ABCA1	600046	PROBUCOL, ADENOSINE TRIPHOSPHATE, GLYBURIDE
ADSS	adenylosuccinate synthase	ENSG00000035687	MGI:87948	ADSS	103060	L-ASPARTIC ACID
AIM2	absent in melanoma 2	ENSG00000163568	MGI:2686159	AIM2	604578
BCAS3	breast carcinoma amplified sequence 3	ENSG00000141376	MGI:2385848	BCAS3	607470
BMP4	bone morphogenetic protein 4	ENSG00000125378	MGI:88180	BMP4	112262
C9orf72	chromosome 9 open reading frame 72	ENSG00000147894	MGI:1920455	C9orf72	614260
CCL5	C-C motif chemokine ligand 5	ENSG00000271503	MGI:98262	CCL5	187011	HEPARIN DISACCHARIDE I-S, HEPARIN DISACCHARIDE III-S
CCND1	cyclin D1	ENSG00000110092	MGI:88313	CCND1	168461	TAMOXIFEN, LY2835219, LEE011
CD14	CD14 molecule	ENSG00000170458	MGI:88318	CD14	158120
CD160	CD160 molecule	ENSG00000117281	MGI:1860383	CD160	604463
CD244	CD244 molecule	ENSG00000122223	MGI:109294	CD244	605554
CD274	CD274 molecule	ENSG00000120217	MGI:1926446	CD274	605402	MDX1105; BMS 936,559, Atezolizumab (MPDL3280A), MEDI4736, Avelumab (MSB0010718C)
CD36	CD36 molecule	ENSG00000135218	MGI:107899	CD36	173510	ABT-510
CD44	CD44 molecule (Indian blood group)	ENSG00000026508	MGI:88338	CD44	107269
CD81	CD81 molecule	ENSG00000110651	MGI:1096398	CD81	186845
CD82	CD82 molecule	ENSG00000085117	MGI:104651	CD82	600623
CHEK1	checkpoint kinase 1	ENSG00000149554	MGI:1202065	CHEK1	603078	LY2603618, AZD7762, SCH900776, ISOGRANULATIMIDE, SB 218078, 2-[(5,6-DIPHENYLFURO[2,3-D]PYRIMIDIN-4-YL)AMINO]ETHANOL, 18-CHLORO-11,12,13,14-TETRAHYDRO-1H,10H-8,4-(AZENO)-9,15,1,3,6-BENZODIOXATRIAZACYCLOHEPTADECIN-2-ONE, 1-(5-CHLORO-2,4-DIMETHOXYPHENYL)-3-(5-CYANOPYRAZIN-2-YL)UREA, (2R)-1-[(5,6-DIPHENYL-7H-PYRROLO[2,3-D]PYRIMIDIN-4-YL)AMINO]PROPAN-2-OL, 2-[5,6-BIS-(4-METHOXY-PHENYL)-FURO[2,3-D]PYRI…
CNNM2	cyclin and CBS domain divalent metal cation transport mediator 2	ENSG00000148842	MGI:2151054	CNNM2	607803
CNTNAP2	contactin associated protein-like 2	ENSG00000174469	MGI:1914047	CNTNAP2	604569
CSMD1	CUB and Sushi multiple domains 1	ENSG00000183117	MGI:2137383	CSMD1	608397
CTLA4	cytotoxic T-lymphocyte associated protein 4	ENSG00000163599	MGI:88556	CTLA4	123890	MELPHALAN, IPILIMUMAB (BMS-734,016; MDX010)
CTSB	cathepsin B	ENSG00000164733	MGI:88561	CTSB	116810	2-AMINOETHANIMIDIC ACID, 3-AMINO-4-OXYBENZYL-2-BUTANONE, DIPHENYLACETIC ACID, N-[1-HYDROXYCARBOXYETHYL-CARBONYL]LEUCYLAMINO-2-METHYL-BUTANE, N-{[(2S,3S)-3-(ETHOXYCARBONYL)OXIRAN-2-YL]CARBONYL}-L-ISOLEUCINE, N-{[(2S,3S)-3-(ETHOXYCARBONYL)OXIRAN-2-YL]CARBONYL}-L-ISOLEUCYL-L-ALANINE, N-{[(2S,3S)-3-(ETHOXYCARBONYL)OXIRAN-2-YL]CARBONYL}-L-ISOLEUCYL-L-ISOLEUCINE
CXCL10	C-X-C motif chemokine ligand 10	ENSG00000169245	MGI:1352450	CXCL10	147310	N-METHYLLEUCINE
CXCL12	C-X-C motif chemokine ligand 12	ENSG00000107562	MGI:103556	CXCL12	600835
CYP17A1	cytochrome P450 family 17 subfamily A member 1	ENSG00000148795	MGI:88586	CYP17A1	609300	ABIRATERONE ACETATE, ORTERONEL, ABIRATERONE, GALETERONE, PROGESTERONE
DYNC1I1	dynein cytoplasmic 1 intermediate chain 1	ENSG00000158560	MGI:107743	DYNC1I1	603772
FCER1G	Fc fragment of IgE receptor Ig	ENSG00000158869	MGI:95496	FCER1G	147139
FCGR1A	Fc fragment of IgG receptor Ia	ENSG00000150337	MGI:95498	FCGR1A	146760	PORFIMER, METHYL AMINOLEVULINATE
FUS	FUS RNA binding protein	ENSG00000089280	MGI:1353633	FUS	137070
FYB	FYN binding protein	ENSG00000082074	MGI:1346327	FYB	602731
GPC6	glypican 6	ENSG00000183098	MGI:1346322	GPC6	604404
GRN	granulin	ENSG00000030582	MGI:95832	GRN	138945
HECW1	HECT, C2 and WW domain containing E3 ubiquitin protein ligase 1	ENSG00000002746	MGI:2444115	HECW1	610384
HIF1A	hypoxia inducible factor 1 alpha subunit	ENSG00000100644	MGI:106918	HIF1A	603348	PX-478, NITROGLYCERIN, NOSCAPINE, ENMD-1198, N-[(1-CHLORO-4-HYDROXYISOQUINOLIN-3-YL)CARBONYL]GLYCINE, 2-METHOXYESTRADIOL, CARVEDILOL
IFITM2	interferon induced transmembrane protein 2	ENSG00000185201	MGI:1933382	IFITM2	605578
IFITM3	interferon induced transmembrane protein 3	ENSG00000142089	MGI:1913391	IFITM3	605579
IFNG	interferon, gamma	ENSG00000111537	MGI:107656	IFNG	147570	OLSALAZINE
LAG3	lymphocyte activating 3	ENSG00000089692	MGI:106588	LAG3	153337
LGR5	leucine-rich repeat containing G protein-coupled receptor 5	ENSG00000139292	MGI:1341817	LGR5	606667
LIPC	lipase C, hepatic type	ENSG00000166035	MGI:96216	LIPC	151670
MAPT	microtubule associated protein tau	ENSG00000186868	MGI:97180	MAPT	157140	PACLITAXEL, DOCETAXEL
MTOR	mechanistic target of rapamycin	ENSG00000198793	MGI:1928394	MTOR	601231	EVEROLIMUS, AZD5363, PAZOPANIB, RAPAMYCIN, AZD8055, OSI-027, SF1126, TEMSIROLIMUS, GDC-0980, PKI-587, PI-103, XL765, NVP-BGT226, RIDAFOROLIMUS, CH5132799, AZD2014, METFORMIN, SIROLIMUS, DEFOROLIMUS, PALOMID 529, PIMECROLIMUS, AP1903
MYH9	myosin, heavy chain 9, non-muscle	ENSG00000100345	MGI:107717	MYH9	160775
MYO16	myosin XVI	ENSG00000041515	MGI:2685951	MYO16	615479
NCKAP1L	NCK associated protein 1 like	ENSG00000123338	MGI:1926063	NCKAP1L	141180
NFKB1	nuclear factor kappa B subunit 1	ENSG00000109320	MGI:97312	NFKB1	164011	THALIDOMIDE, BORTEZOMIB, BARDOXOLONE, TRIFLUSAL
NLRC4	NLR family, CARD domain containing 4	ENSG00000091106	MGI:3036243	NLRC4	606831
NLRP3	NLR family, pyrin domain containing 3	ENSG00000162711	MGI:2653833	NLRP3	606416
OAS1	2'-5'-oligoadenylate synthetase 1	ENSG00000089127	MGI:2180860	OAS1	164350	CYSTEINE-S-ACETAMIDE
OAS2	2'-5'-oligoadenylate synthetase 2	ENSG00000111335	MGI:2180852	OAS2	603350
PARK2	parkin RBR E3 ubiquitin protein ligase	ENSG00000185345	MGI:1355296	PARK2	602544
PDCD1	programmed cell death 1	ENSG00000188389	MGI:104879	PDCD1	600244	Nivolumab (BMS 936,558; MDX1106; ONO 4,538), Pembrolizumab (MK 3,475), Pidilizumab (CT-011), AMP 224 (B7 DC Ig), AMP 514 (MEDI0680)
PDCD1LG2	programmed cell death 1 ligand 2	ENSG00000197646	MGI:1930125	PDCD1LG2	605723
PLEKHG1	pleckstrin homology and RhoGEF domain containing G1	ENSG00000120278	MGI:2676551	PLEKHG1	NA
PRKAA1	protein kinase AMP-activated catalytic subunit alpha 1	ENSG00000132356	MGI:2145955	PRKAA1	602739	PHENFORMIN, METFORMIN HYDROCHLORIDE, ADENOSINE TRIPHOSPHATE
PRKCA	protein kinase C alpha	ENSG00000154229	MGI:97595	PRKCA	176960	MIDOSTAURIN, ENZASTAURIN, QUERCETIN, AFFINITAC, RUBOXISTAURIN, INGENOL MEBUTATE, BRYOSTATIN, BRYOSTATIN-1, SOTRASTAURIN ACETATE, VITAMIN E,TAMOXIFEN,PHOSPHATIDYLSERINE,ELLAGIC ACID
PTPRC	protein tyrosine phosphatase, receptor type C	ENSG00000081237	MGI:97810	PTPRC	151460
RFC3	replication factor C subunit 3	ENSG00000133119	MGI:1916513	RFC3	600405
SFXN2	sideroflexin 2	ENSG00000156398	MGI:2137678	SFXN2	615570
SLC41A1	solute carrier family 41 member 1	ENSG00000133065	MGI:2444823	SLC41A1	610801
SLC8A1	solute carrier family 8 member A1	ENSG00000183023	MGI:107956	SLC8A1	182305
SLCO3A1	solute carrier organic anion transporter family member 3A1	ENSG00000176463	MGI:1351867	SLCO3A1	612435
SNCA	synuclein alpha	ENSG00000145335	MGI:1277151	SNCA	163890
STAT3	signal transducer and activator of transcription 3	ENSG00000168610	MGI:103038	STAT3	102582	ATIPRIMOD, DCL000217
TARDBP	TAR DNA binding protein	ENSG00000120948	MGI:2387629	TARDBP	605078
TLR2	toll like receptor 2	ENSG00000137462	MGI:1346060	TLR2	603028	PEPTIDOGLYCAN, DIAPEP277, DB03963
TNF	tumor necrosis factor	ENSG00000232810	MGI:104798	TNF	191160	THALIDOMIDE, LENALIDOMIDE, CARBAMAZEPINE, PIRFENIDONE, PENTOXIFYLLINE, AJULEMIC ACID, DELMITIDE, POMALIDOMIDE, AMRINONE, VX-702, PSEUDOEPHEDRINE, CHLOROQUINE, CLENBUTEROL, EPINEPHRINE
TTLL7	tubulin tyrosine ligase like 7	ENSG00000137941	MGI:1918142	TTLL7	NA
TYROBP	TYRO protein tyrosine kinase binding protein	ENSG00000011600	MGI:1277211	TYROBP	604142
VDR	vitamin D (1,25- dihydroxyvitamin D3) receptor	ENSG00000111424	MGI:103076	VDR	601769	ERGOCALCIFEROL, PARICALCITOL, DIHYDROTACHYSTEROL, CALCIPOTRIOL, CALCITRIOL, CHOLECALCIFEROL, CALCIPOTRIENE, CALCIFEDIOL, DOXERCALCIFEROL, LITHOCHOLIC ACID, LEXACALCITOL, SEOCALCITOL, TACALCITOL, 1,25-DIHYDROXYVITAMIN D3, INECALCITOL, ELOCALCITOL, CALCIUM, BONEFOS, 5-{2-[1-(1-METHYL-PROPYL)-7A-METHYL-OCTAHYDRO-INDEN-4-YLIDENE]-ETHYLIDENE}-2-METHYLENE-CYCLOHEXANE-1,3-DIOL, 1,3-CYCLOHEXANEDIOL, 4-ME…
